# Supplementary material for: Binding site of restriction-modification system controller protein in Mollicutes
Source: PubMed Central journal article supplement (PMC5282649; doi:10.1186/s12866-017-0935-4), 2017-01-31
Supplement: 12866_2017_935_MOESM1_ESM.pdf [file 12866_2017_935_MOESM1_ESM.pdf]

## Supplementary tables

**Supplementary table 1.** Distribution of restriction-modification proteins in Mollicutes. If at least one protein of particular type is encoded within the genome it is marked with 1, F indicates protein fusion. Columns: C – controller subunit (transcription factor), M I – methylase of type 1 RM-system, S I – specificity subunit of type 1 RM-system, R I – restrictase subunit of type 1 RM-system, M II - methylase of type 2 RM-system; Sequence – putative controller subunit binding sites upstream of respective RM-operon.

| Species                  | C  | M I | S I | R I | M II | Sequence                                               |
|--------------------------|----|-----|-----|-----|------|--------------------------------------------------------|
| <i>A. axantum</i>        | 0  | 0   | 0   | 0   | 1    |                                                        |
| <i>A. brassicae</i>      | 0  | 1   | 1   | 1   | 1    |                                                        |
| <i>A. equifetale</i>     | 1  | 1   | 1   | 1   | 0    | CAATTTAACGATTGCTACTTTTGAACGATTATTCAACAATGAACGATTAGGGG  |
| <i>A. hippikon</i>       | 1  | 1   | 1   | 1   | 0    | TATTTAACGATTACCATACTTTTTAACGATTGACAACAATTTAACGATTGAGA  |
| <i>A. granularum</i>     | 1  | 1   | 1   | 1   | 0    | TTTTATTTTGTAGTCAACTATTTAACGATTACCTTACTTTTTAACGATTGAGA  |
| <i>A. laidlawii</i>      | 0  | 1   | 1   | 1   | 1    |                                                        |
| <i>A. modicum</i>        | 1  | 1   | 1   | 1   | 0    | TTTGAACGTTTAGGGCTAGTTTTGAACGATTACTCAACTTTTGAACGATTGAGA |
| <i>A. oculi</i>          | 0  | 1   | 1   | 0   | 1    |                                                        |
| <i>A. palmae</i>         | 0  | 1   | 1   | 0   | 1    |                                                        |
| <i>M. agalictiae</i>     | 0  | 1   | 1   | 1   | 1    |                                                        |
| <i>M. arginini</i>       | 1  | 1   | 1   | 1   | 0    | ATAGCAGAAAATGCTATAAATGCTATAATATAATCA                   |
| <i>M. arthritidis</i>    | 0  | 1   | 0   | 0   | 0    |                                                        |
| <i>M. bovis</i>          | 0  | 1   | 1   | 1   | 0    |                                                        |
| <i>M. callifornicum</i>  | F* | 0   | 0   | 0   | F*   | TGTCAAGTAGAGGACATAAAATGCTTTATATCAGCT                   |
| <i>M. capricolum</i>     | 0  | 0   | 0   | 0   | 1    |                                                        |
| <i>M. conjunctivae</i>   | 1  | 1   | 1   | 0   | 1    | CTCAAGTTTTTGTATAAATAAACAAGATAAAAAGC                    |
| <i>M. crocodyli</i>      | 0  | 1   | 1   | 1   | 1    |                                                        |
| <i>M. fermentans</i>     | 1  | 1   | 1   | 1   | 0    | AAAAAATAAAATGTTATAAATTTGTTATAAGTTGTTAG                 |
| <i>M. gallinarum</i>     | 1  | 0   | 0   | 0   | 1    | CGACTAAAAATGCTATAAATGCTATAAATGTTAGC                    |
| <i>M. gallisepticum</i>  | 1  | 1   | 1   | 1   | 0    | TATCGGCTTTGTTATAAATGCTTACGATTTTGA                      |
| <i>M. genitalium</i>     | 0  | 0   | 1   | 0   | 1    |                                                        |
| <i>M. hominis</i>        | 1  | 0   | 0   | 0   | 1    | AATCGACAAAATGATAAGTTTTGATATAGTTAAGAT                   |
| <i>M. hyopneumonia</i>   | 0  | 0   | 0   | 0   | 1    |                                                        |
| <i>M. hyosynoviae</i>    | 1  | 0   | 0   | 0   | 1    | TATAGAGTAAATGTATAAAAATGATAAATTTTGTG                    |
| <i>M. imitans</i>        | 0  | 1   | 1   | 0   | 1    |                                                        |
| <i>M. mobile</i>         | F* | 1   | 1   | 1   | F*   | TTGTATATTTTAAACACAAAATGTTATAATGTAATT                   |
| <i>M. mycoides</i>       | 0  | 0   | 0   | 0   | 1    |                                                        |
| <i>M. penetrans</i>      | 0  | 1   | 1   | 1   | 1    |                                                        |
| <i>M. pneumonia</i>      | 0  | 1   | 1   | 1   | 1    |                                                        |
| <i>M. pulmonis</i>       | 0  | 1   | 1   | 1   | 1    |                                                        |
| <i>M. simbae</i>         | F* | 0   | 0   | 0   | F*   | TGTTAATAAGCGGACAAATAATGCTTAAATTAATAA                   |
| <i>M. synoviae</i>       | 0  | 0   | 0   | 0   | 1    |                                                        |
| <i>U. canigenitalium</i> | F* | 1   | 0   | 0   | F*   | TAGTTATAATATGCTATATTATGCTATATATGAATT                   |
| <i>U. urealiticum</i>    | 0  | 1   | 1   | 1   | 0    |                                                        |

\* - Fusion of controller subunit with methylase subunit.
