# Supplementary material for: Binding site of restriction-modification system controller protein in Mollicutes
Source: PubMed Central journal article supplement (PMC5282649; doi:10.1186/s12866-017-0935-4), 2017-01-31
Supplement: 12866_2017_935_MOESM2_ESM.pdf [file 12866_2017_935_MOESM2_ESM.pdf]

Supplementary figures

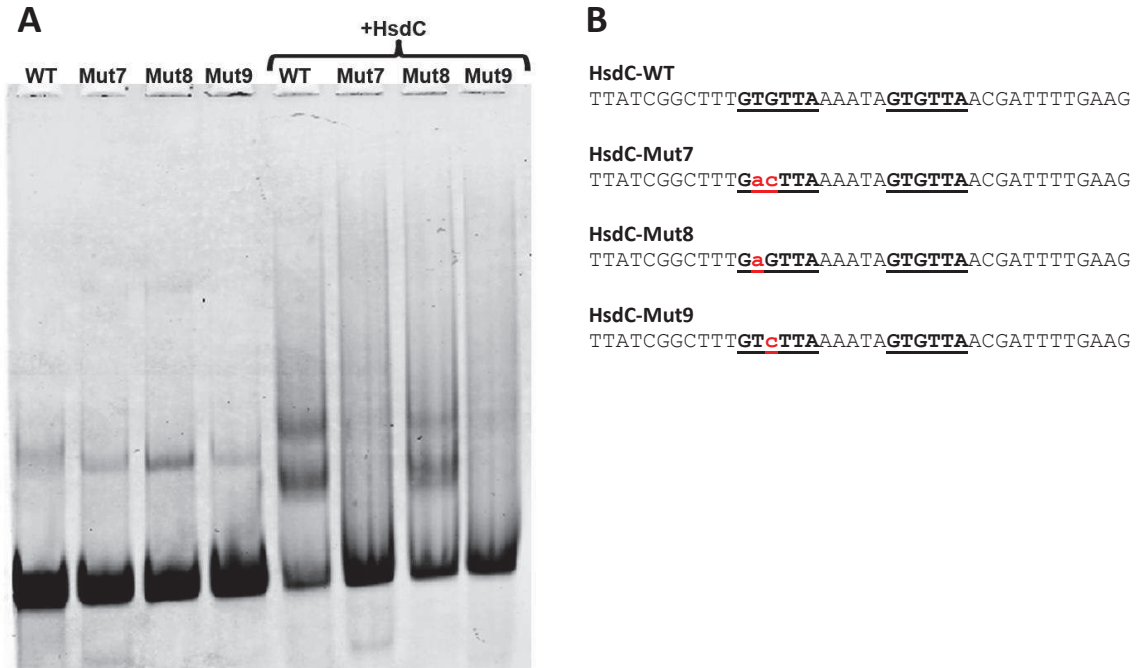

**Supplementary figure 1.** A – EMSA with mutations in a single repeat of HsdC binding site. Series of four lanes on the left represent negative control (no protein added). HsdC protein was added to the four lanes on the right, marked as **+HsdC**. B – Oligonucleotides used for EMSA. HsdC-binding repeats are underlined; mutations are shown in red and lowercase.
