# Supplementary material for: Binding site of restriction-modification system controller protein in Mollicutes
Source: PubMed Central journal article supplement (PMC5282649; doi:10.1186/s12866-017-0935-4), 2017-01-31
Supplement: 12866_2017_935_MOESM3_ESM.pdf [file 12866_2017_935_MOESM3_ESM.pdf]

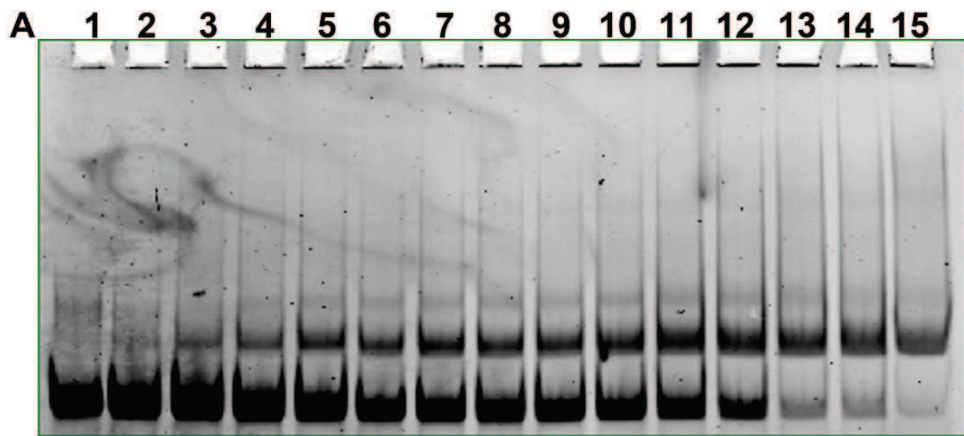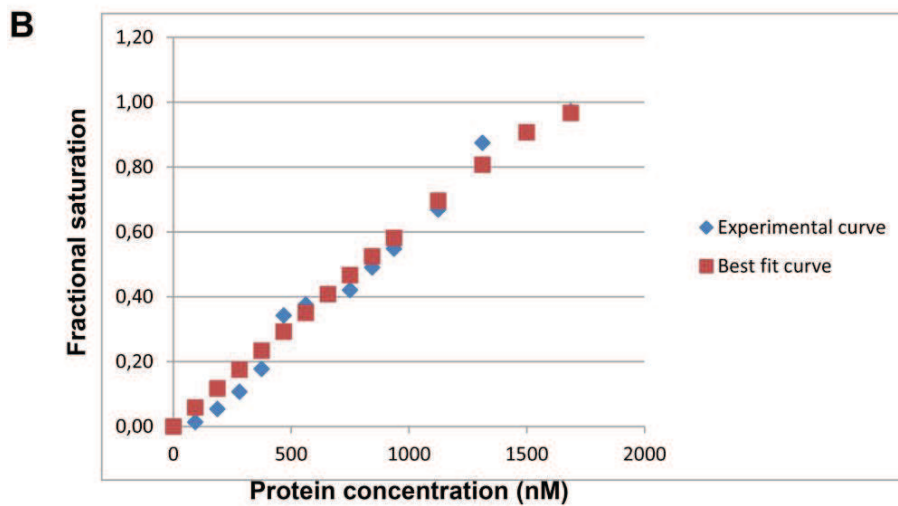

**Supplementary figure 2.** Binding constant determination for HsdC. A – series of EMSA with different protein dilutions 1 to 15: 0, 93.75, 187.5, 281.25, 375, 468.75, 562.5, 656.25, 750, 843.75, 937.5, 1125, 1312.5, 1500, 1687.5 nM. B – Experimental curve and best fit approximation obtained by least squares method.
