# Supplementary material for: Binding site of restriction-modification system controller protein in Mollicutes
Source: PubMed Central journal article supplement (PMC5282649; doi:10.1186/s12866-017-0935-4), 2017-01-31
Supplement: 12866_2017_935_MOESM4_ESM.pdf [file 12866_2017_935_MOESM4_ESM.pdf]

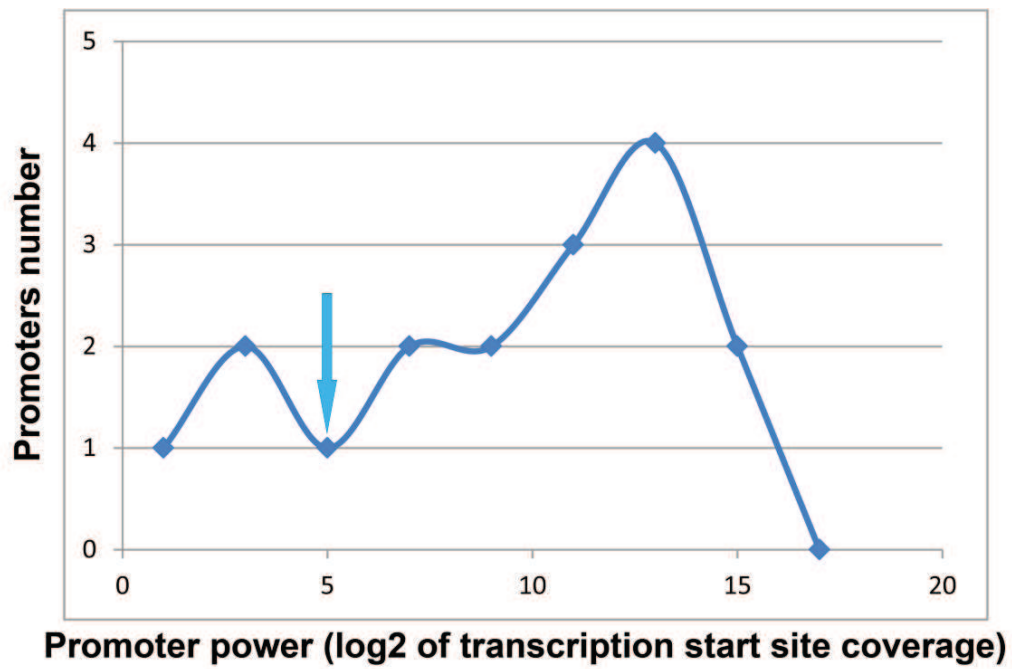

**Supplementary figure 3.** Distribution of promoter powers measured as base 2 logarithm of transcription start site coverage in 5'-end enriched RNA sequencing (Mazin et al, NAR 2014). The promoters taken for the analysis are full consensus promoters as the promoter of *hsd* operon (TRTGNTAWAATN<sub>6</sub>R). Arrow indicates measured power of HsdC promoter, which is significantly lower than it would be expected. Raw data is shown on Supplementary table 2.
