# Supplementary material for: Binding site of restriction-modification system controller protein in Mollicutes
Source: PubMed Central journal article supplement (PMC5282649; doi:10.1186/s12866-017-0935-4), 2017-01-31
Supplement: 12866_2017_935_MOESM5_ESM.pdf [file 12866_2017_935_MOESM5_ESM.pdf]

***M. gallisepticum* str. R(low) and F**

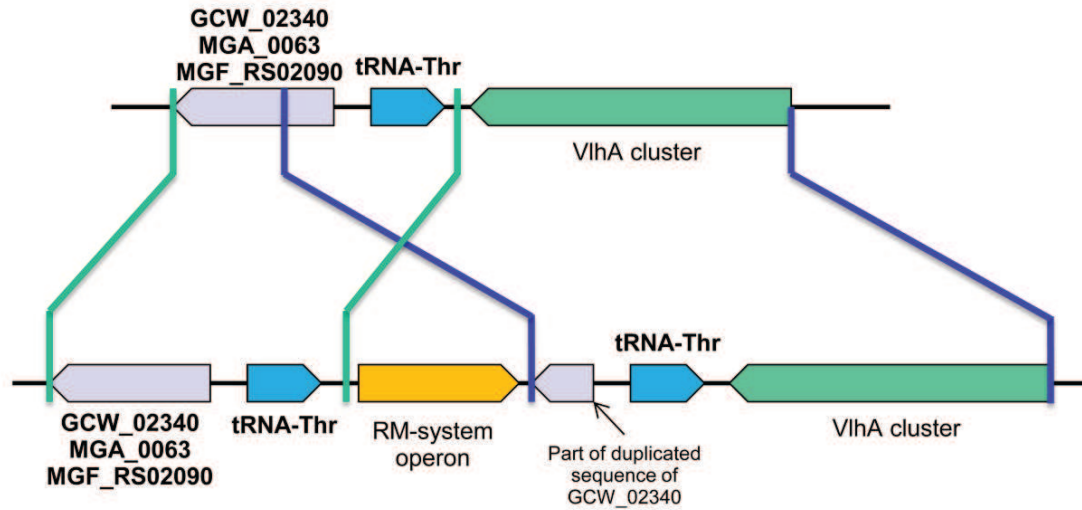

***M. gallisepticum* str. S6**

**Supplementary figure 4.** Genomic rearrangements near *hsd* (GCW\_02350- GCW\_02365) operon insertion in *M. gallisepticum* S6 strain in comparison to R(low) and F strains. Uptake of *hsd* operon resulted in a large genomic duplication.
