# Supplementary material for: Binding site of restriction-modification system controller protein in Mollicutes
Source: PubMed Central journal article supplement (PMC5282649; doi:10.1186/s12866-017-0935-4), 2017-01-31
Supplement: 12866_2017_935_MOESM6_ESM.pdf [file 12866_2017_935_MOESM6_ESM.pdf]

**Supplementary table 2.** Distribution of promoter strengths with strong consensus (TRTGNTAWAATN<sub>6</sub>R). Rep1, Rep2 – biological replicates of 5'-end enriched sequencing. We included promoters of *clpB* and *trnM* (additional targets of HsdC), which have additional substitutions in comparison to consensus.

| Promoter                                   | Rep1  | Rep2  | Gene                |
|--------------------------------------------|-------|-------|---------------------|
| TRTGNTAWAAT                                |       |       |                     |
| TGTTGTACAAACTGATTTGTTGTGCTATAATCTATAAGGC   | 32511 | 26839 | 23S rRNA            |
| AAGCTAGATCTAAAAAAGAATGTGTTATAATTACAAGGAT   | 28610 | 19718 | infC operon         |
| ATCATAGATTTACAAATTTTTATGTTATAATTTTATGGGT   | 13307 | 18499 | trnY operon         |
| TTTTAAAAAACTATTGCTGATATGTTAAAATAGTTAAGGT   | 9816  | 8620  | rpmB                |
| TTAACTTTGAAATCTAATTGTGTGGTATAATTTTAATGAT   | 5505  | 5415  | rpsO operon         |
| CTTTAATGAGCTGAATTAATTATGTTATAATTCATATGGC   | 4270  | 4471  | trnI operon         |
| TAGCCAATAATCAATAATATTATGGTATAATTTTAAAGGC   | 3429  | 2748  | trnN operon         |
| TTCAATAATTAGAATTCCTTATATGTTATAATAAACCTACA  | 2805  | 3489  | gyrB operon         |
| ATTATTAGAGTGCTAATTATTATGGTATAAATATTATTTAG  | 845   | 2881  | lon                 |
| TAAGTAATTTTACTTAACGATATGTTATAATATTTTCAGTT  | 700   | 1015  | rpsP operon         |
| ATCTTTTCAAACGAAAATATTGTGCTATAATTTTAGAGGC   | 168   | 388   | 16S rRNA (gene 1)   |
| GGGTTGGTGCTAGTTAATTTTGTGATAAAAATTATACCATC  | 128   | 65    | dps                 |
| ATCTTTACATTTCAAAAATCTGTGCTATAATTATTATAGT   | 65    | 99    | trnL                |
| TATCGTATTATTATCGGCTTTGTGTTAAAATAGTGTTAAC   | 36    | 58    | <b>hsd operon</b>   |
| ATGATGCGATCGGTGAAGTGTATGATAAAAATTGGCCGAGC  | 12    | 6     | intragenic promoter |
| CTGAGCCATCAGGAATTCCTTATGCTAAAATCGACTACAA   | 7     | 18    | intragenic promoter |
| GTTTAGGTTTAGTTGACTATTATGATAAAAATTGTGTAATT  | 0     | 2     | GCW_03840           |
|                                            |       |       |                     |
| AATAGCCTAAGTGCTAATTTTTTGTGTTATAATAAATCTATT | 1373  | 3248  | clpB                |
| CTAATGATTTTACACATTGTTATTATATGATAATAATGTG   | 472   | 812   | trnM operon         |
|                                            |       |       |                     |
| ATTTTTTCAAATTAATTTTTTGTGTTAGAATATTTGAGGT   | 3894  | 2308  | 16S rRNA (gene 2)   |
